# Supplementary material
Source: publisher site journal article supplement (https://www.dovepress.com/article/424098)
Supplement: Supplementary file 1 [file get_supplementary_file.php]

**Table S1**. Descriptive statistics and comparisons by outcome status in training sample (n=898,763)

| **Outcome** | **Without outcome**  **(n=805,138)** | | **With outcome**  **(n=93,625)** | | **Statistic value** | **Test**  **p-value** |
| --- | --- | --- | --- | --- | --- | --- |
| At least one asthma exacerbation in 90 days from index date | **n** | **%** | **n** | **%** |  |  |
| **Predictors** |  |  |  |  |  |  |
| Geographical region in England |  |  |  |  | 1500.0 | <0.001 |
| North East | 26,314 | 3.3 | 3,961 | 4.2 |  |  |
| North West | 154,311 | 19.2 | 19,980 | 21.3 |  |  |
| Yorkshire | 29,319 | 3.6 | 3,710 | 4.0 |  |  |
| East Midlands | 17,135 | 2.1 | 2,077 | 2.2 |  |  |
| West Midlands | 133,300 | 16.6 | 16,816 | 18.0 |  |  |
| East of England | 36,048 | 4.5 | 3,941 | 4.2 |  |  |
| London | 141,788 | 17.6 | 12,630 | 13.5 |  |  |
| South East | 163,912 | 17.6 | 17,819 | 19.0 |  |  |
| South West | 103,011 | 12.8 | 12,691 | 13.6 |  |  |
| Index of Multiple Deprivation Quintile |  |  |  |  | 867.1 | <0.001 |
| 1 (least deprived) | 160,717 | 20.0 | 16,311 | 17.4 |  |  |
| 2 | 162,499 | 20.2 | 17,901 | 19.1 |  |  |
| 3 | 154,808 | 19.2 | 17,850 | 19.1 |  |  |
| 4 | 163,724 | 20.3 | 19,136 | 20.4 |  |  |
| 5 (most deprived) | 163,390 | 20.3 | 22,427 | 24.0 |  |  |
| Ethnicity |  |  |  |  | 292.7 | <0.001 |
| White | 709,916 | 88.2 | 83,958 | 89.7 |  |  |
| Black | 26,562 | 3.3 | 2,354 | 2.5 |  |  |
| South Asian | 49,006 | 6.1 | 5,543 | 5.9 |  |  |
| Mixed | 10,534 | 1.3 | 961 | 1.0 |  |  |
| Other | 9,120 | 1.1 | 809 | 0.9 |  |  |

**Table S2**. Descriptive statistics and comparisons by sample type

| **Variable** | **Training sample** | | **Testing sample** | | **Validation sample** | | **Statistic value** | **Test**  **p-value** |
| --- | --- | --- | --- | --- | --- | --- | --- | --- |
|  | **N*** | **%** | **N** | **%** | **n** | **%** |  |  |
| **Outcome** |  |  |  |  |  |  |  |  |
| At least one asthma exacerbation in 90 days from index date | 93,625 | 10.4 | 25,537 | 11.3 | 8,545 | 10.9 | 145.0 | <0.001 |
| **Predictors** |  |  |  |  |  |  |  |  |
| Geographical region in England |  |  |  |  |  |  | 1100 | <0.001 |
| North East | 30,275 | 3.4 | 6,787 | 3.0 | 2,485 | 3.2 |  |  |
| North West | 174,291 | 19.4 | 41,734 | 18.4 | 15,139 | 19.4 |  |  |
| Yorkshire | 33,029 | 3.7 | 8,502 | 3.8 | 2,736 | 3.5 |  |  |
| East Midlands | 19,212 | 2.1 | 5,546 | 2.5 | 1,921 | 2.5 |  |  |
| West Midlands | 150,116 | 16.7 | 37,089 | 16.4 | 12,657 | 16.2 |  |  |
| East of England | 39,989 | 4.5 | 9,050 | 4.0 | 3,004 | 3.8 |  |  |
| London | 154,418 | 17.2 | 43,818 | 19.3 | 15,314 | 19.6 |  |  |
| South East | 181,731 | 20.2 | 45,314 | 20.0 | 14,989 | 19.2 |  |  |
| South West | 115,702 | 12.9 | 28,914 | 12.8 | 9,979 | 12.8 |  |  |
| Index of Multiple Deprivation Quintile |  |  |  |  |  |  | 357.1 | <0.001 |
| 1 (least deprived) | 177,028 | 19.7 | 42,188 | 18.6 | 14,005 | 17.9 |  |  |
| 2 | 180,400 | 20.1 | 44,786 | 19.8 | 15,197 | 19.4 |  |  |
| 3 | 172,658 | 19.2 | 44,373 | 19.6 | 15,349 | 19.6 |  |  |
| 4 | 182,860 | 20.4 | 47,785 | 21.1 | 16,714 | 21.4 |  |  |
| 5 (most deprived) | 185,817 | 20.7 | 47,622 | 21.0 | 16,959 | 21.7 |  |  |
| Ethnicity |  |  |  |  |  |  | 3200.0 | <0.001 |
| White | 793,874 | 88.3 | 192,556 | 84.9 | 65,680 | 84.0 |  |  |
| Black | 28,916 | 3.2 | 8,734 | 3.9 | 3,184 | 4.1 |  |  |
| South Asian | 54,549 | 6.1 | 17,385 | 7.7 | 6,267 | 8.0 |  |  |
| Mixed | 11,495 | 1.3 | 4,026 | 1.8 | 1,531 | 2.0 |  |  |
| Other | 9,929 | 1.1 | 4,053 | 1.8 | 1,562 | 2.0 |  |  |

**For categorical variables, numbers (n) and percentages (%) are shown and in addition Chi-square statistic values with the corresponding p-values for the comparison between sample types are given. For continuous variables, medians and Interquartile Ranges (IQR) are shown and Kruskal-Wallis non-parametric statistic values and p-values are given.*
